# Supplementary material for: Senescence and senotherapies in biliary atresia and biliary cirrhosis
Source: publisher site journal article supplement (doi:10.18632/aging.204700), 2023-05-18
Supplement: Supplementary file [file aging-v15-204700-supplementary-material-SD2.pdf]

## SUPPLEMENTARY TABLES

**Supplementary Table 1. Description of the study population.**

|                                        | Controls (n=10)    | BA early (n=5)   | BA late (n=30)    |
|----------------------------------------|--------------------|------------------|-------------------|
| Median age                             | 9.5 y (3 d - 41 y) | 7 w (17 d - 2 m) | 12 m (6 m - 15 y) |
| Gender (M/F)                           | 5 (50%) / 5        | 3 (60%) / 2      | 15 (50%) / 15     |
| AST (UI/L) (< 80)                      | NA                 | 232 ± 78         | 228 ± 19          |
| ALT (UI/L) (< 35)                      | NA                 | 155 ± 57         | 123 ± 11          |
| γGT (UI/L) (< 40)                      | NA                 | 455 ± 78         | 221 ± 30          |
| Total bilirubin (mg/dL) (< 1.2)        | NA                 | 9.1 ± 1.7        | 17.5 ± 1.7        |
| INR (0.8-1.2)                          | NA                 | 1 ± 0.04         | 1.5 ± 0.1         |
| Histological fibrosis (Metavir score): |                    |                  |                   |
| F0                                     | 10 (100%)          | 1 (20%)          | 0                 |
| F1                                     | 0                  | 0                | 0                 |
| F2                                     | 0                  | 1 (20%)          | 0                 |
| F3                                     | 0                  | 1 (20%)          | 0                 |
| F4                                     | 0                  | 2 (40%)          | 30 (100%)         |

In the first column, standard values are indicated for all biochemical parameters. Continuous data is presented as median (range) or mean ± SEM. D, days; m, months; NA, not available; y, years.

**Supplementary Table 2. Primary antibodies.**

| Primary antibody (target) | Company    | Cat. no     | Species | Ag retrieval                                                 | Dilution              |
|---------------------------|------------|-------------|---------|--------------------------------------------------------------|-----------------------|
| p21 WAF1/Cip1 (H)         | Agilent    | M7202       | M mAb   | T 1 hour 98C                                                 | IHC 1/400             |
| p21 WAF1/Cip1 (R)         | Agilent    | M7202       | M mAb   | T 900W 4 min - 90W 15 min - 900W 1.5 min<br>T Retriever 2100 | IHC 1/50<br>IF 1/50   |
| p16 INK4a (H)             | Abcam      | ab108349    | Rb mAb  | T 1 hour 98C                                                 | IHC 1/1000            |
| gamma H2A.X (Ser139) (H)  | Abcam      | ab81299     | Rb mAb  | C 35 min 98C<br>C Retriever 2100                             | IHC 1/500<br>IF 1/500 |
| gamma H2A.X (Ser139) (H)  | Merck      | 05-636      | M mAb   | C 5 min 450W                                                 | IF 1/1000             |
| TRF2 (H)                  | Novus      | NB110-57130 | Rb pAb  | C 5 min 450W                                                 | IF 1/2000             |
| HNF4α (H-R)               | R&D System | PP-H1415    | M mAb   | C Retriever 2100                                             | IF 1/400              |
| CK19 (H)                  | Dako       | M0888       | M mAb   | C 35 min 98C<br>C Retriever 2100                             | IHC 1/100<br>IF 1/100 |
| CK19 (R)                  | Abcam      | ab220193    | M mAb   | C Retriever 2100                                             | IF 1/200              |

Ag, antigen; C, citrate; H, human; IF, immunofluorescence; IHC, immunohistochemistry; M, Mouse; mAb, monoclonal antibody; pAb, polyclonal antibody; R, rat; Rb, rabbit; T, Tris-EDTA.

**Supplementary Table 3. Pre-designed TaqMan probes used for reverse transcription quantitative polymerase chain reaction.**

| <b>Gene of interest (specie)</b> | <b>Company</b>           | <b>Reference</b>    |
|----------------------------------|--------------------------|---------------------|
| <i>CDKN1A (H)</i>                | Thermo Fisher Scientific | Hs00355782_m1       |
| <i>CDKN2A (H)</i>                | Thermo Fisher Scientific | Hs00923894_m1       |
| <i>CXCL8 (H)</i>                 | IDT                      | Hs.PT.58.38869678.g |
| <i>TGFBI (H)</i>                 | IDT                      | Hs.PT.58.39813975   |
| <i>COL1A1 (H)</i>                | Thermo Fisher Scientific | Hs00164004_m1       |
| <i>KRT19 (H)</i>                 | Thermo Fisher Scientific | Hs00761767_s1       |
| <i>HNF4A (H)</i>                 | Thermo Fisher Scientific | Hs00230853_m1       |
| <i>TBP (H)</i>                   | Thermo Fisher Scientific | Hs99999910_m1       |
| <i>PPIA (H)</i>                  | Thermo Fisher Scientific | Hs99999904_m1       |
| <i>Cdkn1a (R)</i>                | IDT                      | Rn.PT.58.12154239   |
| <i>Cdkn2a (R)</i>                | Thermo Fisher Scientific | Rn00580664_m1       |
| <i>Il1b (R)</i>                  | IDT                      | Rn.PT.58.38028824   |
| <i>Tgfb1 (R)</i>                 | IDT                      | Rn.PT.58.6690138    |
| <i>Col1a1 (R)</i>                | IDT                      | Rn.PT.58.7562513    |
| <i>Sox9 (R)</i>                  | IDT                      | Rn.PT.58.29440750   |
| <i>Hnf4a (R)</i>                 | IDT                      | Rn.PT.58.34229621.g |
| <i>Gpx1 (R)</i>                  | IDT                      | Rn.PT.58.7204268.g  |
| <i>Gapdh (R)</i>                 | Thermo Fisher Scientific | Rn01775763_g1       |
| <i>B2m (R)</i>                   | Thermo Fisher Scientific | Rn00560865_m1       |
